# Supplementary material for: The Effects of a Low Linoleic Acid/α-Linolenic Acid Ratio on Lipid Metabolism and Endogenous Fatty Acid Distribution in Obese Mice
Source: MDPI journal article supplement (doi:10.3390/ijms241512117), 2023-07-28
Supplement: s1 [file s1]

**Table S1.** Fatty acid composition of brain (%).

| <b>Fatty acids</b> | <b>LFD</b> | <b>HFD</b> | <b>HFD+H3L6</b> | <b>HFD+L3H6</b> |
|--------------------|------------|------------|-----------------|-----------------|
| C16:0              | 20.63±1.76 | 22.50±1.45 | 19.94±1.29      | 20.50±1.51      |
| C16:1 n-7          | 0.43±0.02  | 0.38±0.03  | 0.38±0.05       | 0.34±0.04       |
| C18:0              | 20.52±1.78 | 18.69±0.60 | 19.42±0.46      | 19.84±0.92      |
| C18:1 n-9          | 19.64±0.72 | 19.41±0.37 | 18.75±0.32      | 18.60±0.81      |
| C18:2 n-6          | 0.91±0.14  | 0.91±0.05  | 0.72±0.25       | 1.10±0.41       |
| C18:3 n-3          |            |            |                 |                 |
| C18:3 n-6          |            |            |                 |                 |
| C20:3 n-6          | 0.75±0.27  | 0.55±0.20  | 0.85±0.33       | 0.55±0.17       |
| C20:4n-6           | 859±1.94   | 9.48±2.18  | 8.09±2.01       | 9.05±1.58       |
| C20:5n-3           |            | 0.11±0.02  | 0.12±0.02       | 0.10±0.02       |
| C22:5n-3           |            | 0.14±0.01  | 0.17±0.02       | 0.15±0.02       |
| C22:6n-3           | 10.30±0.92 | 10.77±1.11 | 10.89±0.43      | 10.18±0.67      |
| SFA                | 41.14±1.85 | 41.19±1.70 | 39.35±0.90      | 40.34±0.71      |
| MUFA               | 20.07±0.73 | 19.79±0.39 | 19.13±0.37      | 18.95±0.84      |
| PUFA               | 20.62±2.40 | 21.91±2.36 | 21.84±0.59      | 21.46±0.82      |
| n-6                | 10.25±1.54 | 10.94±2.03 | 9.66±0.29       | 11.04±0.63      |
| n-3                | 10.30±0.92 | 10.98±1.09 | 11.18±0.41      | 10.43±0.64      |
| n-6/n-3            | 0.99±0.06  | 1.01±0.20  | 0.79±0.03       | 1.06±0.06       |

\* Data are means ± standard error (n = 10). Different letters indicate significant differences ( $P<0.05$ ) between each group, and the same letters indicate that there is no significant difference ( $P>0.05$ ) between each group.

**Table S2.** Fatty acid composition of heart (%).

| Fatty acids | LFD                      | HFD                      | HFD+H3L6                 | HFD+L3H6                |
|-------------|--------------------------|--------------------------|--------------------------|-------------------------|
| C16:0       | 13.77±0.92               | 11.60±1.44               | 11.17±1.92               | 10.57±0.91              |
| C16:1 n-7   | 0.17±0.01 <sup>b</sup>   | 0.07±0.01 <sup>a</sup>   | 0.16±0.04 <sup>b</sup>   | 0.13±0.01 <sup>b</sup>  |
| C18:0       | 19.62±2.53               | 19.49±1.12               | 18.66±1.29               | 18.88±1.31              |
| C18:1 n-9   | 6.23±1.42                | 6.15±0.97                | 6.26±1.08                | 6.28±0.98               |
| C18:2 n-6   | 17.99±1.12               | 17.65±1.46               | 17.57±0.79               | 19.22±1.59              |
| C18:3 n-3   | 0.43±0.08 <sup>b</sup>   | 0.03±0.01 <sup>a</sup>   | 1.44±0.10 <sup>c</sup>   | 0.04±0.01 <sup>a</sup>  |
| C18:3 n-6   |                          |                          | 0.17±0.05                |                         |
| C20:3 n-6   | 8.80±1.03                | 9.08±1.04                | 9.81±1.21                | 10.62±0.64              |
| C20:4n-6    | 9.53±1.64 <sup>a</sup>   | 13.94±0.94 <sup>b</sup>  | 9.02±0.91 <sup>a</sup>   | 10.83±0.87 <sup>b</sup> |
| C20:5n-3    | 1.37±0.33 <sup>ab</sup>  | 1.80±0.65 <sup>ab</sup>  | 1.07±0.17 <sup>a</sup>   | 2.24±0.23 <sup>b</sup>  |
| C22:5n-3    |                          |                          |                          |                         |
| C22:6n-3    | 11.94±0.96 <sup>bc</sup> | 10.07±0.91 <sup>ab</sup> | 12.55±0.88 <sup>c</sup>  | 8.93±1.09 <sup>a</sup>  |
| SFA         | 33.39±3.27               | 31.09±0.75               | 29.83±0.64               | 29.45±1.49              |
| MUFA        | 6.40±1.41                | 6.22±0.97                | 6.43±1.24                | 6.42±0.98               |
| PUFA        | 50.27±2.80               | 52.58±1.69               | 53.00±0.85               | 54.00±0.34              |
| n-6         | 36.53±2.48 <sup>a</sup>  | 40.67±1.86 <sup>bc</sup> | 37.95±0.91 <sup>ab</sup> | 42.79±1.09 <sup>c</sup> |
| n-3         | 13.74±1.11 <sup>bc</sup> | 11.90±0.59 <sup>ab</sup> | 15.06±1.05 <sup>c</sup>  | 11.21±0.87 <sup>a</sup> |
| n-6/n-3     | 2.68±0.29 <sup>a</sup>   | 3.43±0.28 <sup>b</sup>   | 2.53±0.19 <sup>a</sup>   | 3.85±0.41 <sup>b</sup>  |

\* Data are means ± standard error (n = 10). Different letters indicate significant differences ( $P<0.05$ ) between each group, and the same letters indicate that there is no significant difference ( $P>0.05$ ) between each group.

**Table S3.** Fatty acid composition of gastrocnemius (%).

| <b>Fatty acids</b> | <b>LFD</b>               | <b>HFD</b>               | <b>HFD+H3L6</b>          | <b>HFD+L3H6</b>         |
|--------------------|--------------------------|--------------------------|--------------------------|-------------------------|
| C16:0              | 25.84±3.40               | 21.24±3.73               | 20.69±2.82               | 19.14±2.74              |
| C16:1 n-7          | 0.77±0.07 <sup>c</sup>   | 0.52±0.02 <sup>b</sup>   | 0.32±0.04 <sup>a</sup>   | 0.42±0.04 <sup>ab</sup> |
| C18:0              | 7.61±1.44 <sup>a</sup>   | 10.91±0.29 <sup>b</sup>  | 8.26±1.11 <sup>a</sup>   | 8.59±0.58 <sup>a</sup>  |
| C18:1 n-9          | 18.74±1.42 <sup>c</sup>  | 16.97±2.21 <sup>bc</sup> | 13.17±1.89 <sup>ab</sup> | 11.36±0.91 <sup>a</sup> |
| C18:2 n-6          | 17.40±0.68 <sup>a</sup>  | 19.52±1.63 <sup>a</sup>  | 20.39±4.16 <sup>a</sup>  | 27.19±1.67 <sup>b</sup> |
| C18:3 n-3          | 0.48±0.10 <sup>a</sup>   | 0.42±0.09 <sup>a</sup>   | 6.24±1.72 <sup>b</sup>   | 0.63±0.07 <sup>a</sup>  |
| C18:3 n-6          |                          |                          |                          |                         |
| C20:3 n-6          | 7.85±1.51 <sup>b</sup>   | 3.60±0.97 <sup>a</sup>   | 4.63±1.34 <sup>a</sup>   | 5.35±1.10 <sup>ab</sup> |
| C20:4n-6           | 3.91±0.79 <sup>a</sup>   | 7.07±0.76 <sup>b</sup>   | 2.17±0.74 <sup>a</sup>   | 7.82±0.72 <sup>b</sup>  |
| C20:5n-3           | 0.40 ±0.27               | 0.39±0.26                | 0.15±0.10                | 0.70±0.48               |
| C22:5n-3           | 0.37±0.03 <sup>a</sup>   | 1.08±0.16 <sup>b</sup>   | 0.37±0.13 <sup>a</sup>   | 0.91±0.06 <sup>b</sup>  |
| C22:6n-3           | 11.70±1.39 <sup>c</sup>  | 7.43±0.59 <sup>bc</sup>  | 9.91±1.53 <sup>bc</sup>  | 6.47±1.06 <sup>a</sup>  |
| SFA                | 33.45±1.96               | 32.15±3.44               | 28.95±1.97               | 27.73±3.32              |
| MUFA               | 19.51±1.48 <sup>a</sup>  | 17.49±2.19 <sup>a</sup>  | 13.49±1.89 <sup>b</sup>  | 11.78±0.87 <sup>b</sup> |
| PUFA               | 42.10±3.14 <sup>ab</sup> | 39.51±1.27 <sup>a</sup>  | 43.86±4.66 <sup>ab</sup> | 49.06±2.70 <sup>b</sup> |
| n-6                | 29.15±1.61 <sup>a</sup>  | 30.19±1.84 <sup>a</sup>  | 27.19±5.85 <sup>a</sup>  | 40.36±2.06 <sup>b</sup> |
| n-3                | 12.95±1.53 <sup>b</sup>  | 9.32±0.57 <sup>a</sup>   | 16.67±0.54 <sup>c</sup>  | 8.70±1.41 <sup>a</sup>  |
| n-6/n-3            | 2.27±0.14 <sup>a</sup>   | 3.26±0.40 <sup>b</sup>   | 1.62±0.32 <sup>a</sup>   | 4.73±0.54 <sup>c</sup>  |

\* Data are means ± standard error (n = 10). Different letters indicate significant differences ( $P<0.05$ ) between each group, and the same letters indicate that there is no significant difference ( $P>0.05$ ) between each group.

**Table S4.** Fatty acid composition of spleen (%).

| Fatty acids | LFD                      | HFD                      | HFD+H3L6                | HFD+L3H6                 |
|-------------|--------------------------|--------------------------|-------------------------|--------------------------|
| C16:0       | 27.45±1.00 <sup>c</sup>  | 23.66±0.92 <sup>b</sup>  | 20.22±2.60 <sup>a</sup> | 19.06±1.61 <sup>a</sup>  |
| C16:1 n-7   | 0.56±0.07 <sup>a</sup>   | 0.55±0.09 <sup>a</sup>   | 2.71±0.66 <sup>b</sup>  | 0.55±0.05 <sup>a</sup>   |
| C18:0       | 13.25±0.6                | 13.71±0.74               | 12.77±1.90              | 13.36±0.93               |
| C18:1 n-9   | 18.67±0.91               | 18.28±0.90               | 17.58±0.74              | 17.54±1.00               |
| C18:2 n-6   | 10.49±0.83 <sup>b</sup>  | 8.33±0.49 <sup>a</sup>   | 10.22±0.84 <sup>b</sup> | 13.26±0.710 <sup>c</sup> |
| C18:3 n-3   | 0.57±0.32 <sup>a</sup>   | 0.63±0.08 <sup>a</sup>   | 3.95±0.54 <sup>b</sup>  | 0.61±0.10 <sup>a</sup>   |
| C18:3 n-6   |                          |                          |                         |                          |
| C20:3 n-6   | 6.36±0.61 <sup>a</sup>   | 9.42±0.87 <sup>b</sup>   | 6.22±0.56 <sup>a</sup>  | 9.29±0.49 <sup>b</sup>   |
| C20:4n-6    | 8.95±1.15 <sup>a</sup>   | 11.58±0.94 <sup>b</sup>  | 8.44±0.60 <sup>a</sup>  | 11.42±1.18 <sup>b</sup>  |
| C20:5n-3    | 1.24±0.80                | 0.96±0.24                | 0.58±0.07               | 1.25±0.24                |
| C22:5n-3    | 1.02±0.16 <sup>a</sup>   | 0.95±0.11 <sup>a</sup>   | 1.97±0.50 <sup>b</sup>  | 0.97±0.11 <sup>a</sup>   |
| C22:6n-3    | 1.93±0.43 <sup>a</sup>   | 1.21±0.14 <sup>a</sup>   | 3.89±0.14 <sup>b</sup>  | 1.84±0.61 <sup>a</sup>   |
| SFA         | 40.69±0.96 <sup>c</sup>  | 37.37±0.39 <sup>b</sup>  | 32.98±4.44 <sup>a</sup> | 32.42±0.75 <sup>a</sup>  |
| MUFA        | 19.23±0.97 <sup>ab</sup> | 18.84±0.81 <sup>ab</sup> | 20.29±0.60 <sup>b</sup> | 18.08±1.04 <sup>a</sup>  |
| PUFA        | 30.55±0.86 <sup>a</sup>  | 33.10±0.83 <sup>b</sup>  | 35.26±1.54 <sup>b</sup> | 38.62±0.93 <sup>c</sup>  |
| n-6         | 25.80±0.83 <sup>a</sup>  | 33.20±0.72 <sup>b</sup>  | 24.87±1.03 <sup>a</sup> | 33.96±0.90 <sup>c</sup>  |
| n-3         | 4.75±1.44 <sup>a</sup>   | 3.76±0.38 <sup>a</sup>   | 10.39±0.81 <sup>b</sup> | 4.66±0.48 <sup>a</sup>   |
| n-6/n-3     | 6.07±2.17 <sup>b</sup>   | 7.86±0.68 <sup>b</sup>   | 2.41±0.19 <sup>a</sup>  | 7.38±0.88 <sup>b</sup>   |

\* Data are means ± standard error (n = 10). Different letters indicate significant differences ( $P<0.05$ ) between each group, and the same letters indicate that there is no significant difference ( $P>0.05$ ) between each group.

**Table S5.** Fatty acid composition of erythrocyte (%).

| Fatty acids | LFD                      | HFD                      | HFD+H3L6                 | HFD+L3H6                 |
|-------------|--------------------------|--------------------------|--------------------------|--------------------------|
| C16:0       | 30.76±2.40 <sup>c</sup>  | 28.85±1.38 <sup>ab</sup> | 25.81±0.83 <sup>a</sup>  | 27.25±1.15 <sup>ab</sup> |
| C16:1 n-7   | 0.56±0.06                | 0.42±0.12                | 0.47±0.07                | 0.44±0.06                |
| C18:0       | 15.12±1.58 <sup>b</sup>  | 9.94±1.19 <sup>a</sup>   | 10.72±1.38 <sup>a</sup>  | 12.21±1.31 <sup>ab</sup> |
| C18:1 n-9   | 7.97±1.03 <sup>a</sup>   | 14.49±1.52 <sup>b</sup>  | 13.89±1.85 <sup>b</sup>  | 12.83±1.55 <sup>b</sup>  |
| C18:2 n-6   | 9.65±1.33                | 9.20±0.30                | 8.57±0.28                | 9.89±0.39                |
| C18:3 n-3   | 0.03± 0.01 <sup>a</sup>  | 0.17±0.03 <sup>a</sup>   | 0.45±0.12 <sup>b</sup>   | 0.16±0.03 <sup>a</sup>   |
| C18:3 n-6   | 2.08±0.41 <sup>b</sup>   | 0.77±0.31 <sup>a</sup>   | 1.73±0.33 <sup>ab</sup>  | 2.56±0.83 <sup>b</sup>   |
| C20:3 n-6   | 3.12±0.12 <sup>a</sup>   | 3.49±0.23 <sup>ab</sup>  | 3.23±0.14 <sup>ab</sup>  | 3.63±0.28 <sup>b</sup>   |
| C20:4 n-6   | 5.82±1.22 <sup>a</sup>   | 9.13±1.12 <sup>b</sup>   | 6.72±2.09 <sup>a</sup>   | 11.05±1.39 <sup>b</sup>  |
| C20:5 n-3   | 0.13±0.01 <sup>a</sup>   | 0.13±0.01 <sup>a</sup>   | 0.31±0.10 <sup>ab</sup>  | 0.35±0.07 <sup>b</sup>   |
| C22:5 n-3   | 0.47±0.12                | 0.54±0.07                | 0.64±0.12                | 0.63±0.11                |
| C22:6 n-3   | 1.85±0.41 <sup>a</sup>   | 1.73±0.57 <sup>a</sup>   | 5.05±0.85 <sup>b</sup>   | 2.13±0.57 <sup>a</sup>   |
| SFA         | 47.67±1.05 <sup>b</sup>  | 40.37±0.26 <sup>a</sup>  | 39.16±1.72 <sup>a</sup>  | 41.07±2.22 <sup>a</sup>  |
| MUFA        | 9.40±1.03 <sup>a</sup>   | 15.81±1.47 <sup>b</sup>  | 15.22±1.73 <sup>ab</sup> | 14.20±1.42 <sup>b</sup>  |
| PUFA        | 23.01±1.74 <sup>a</sup>  | 25.57±1.64 <sup>b</sup>  | 26.98±1.34 <sup>ab</sup> | 31.46±2.32 <sup>b</sup>  |
| n-6         | 20.38±1.29 <sup>ab</sup> | 22.66±1.44 <sup>b</sup>  | 20.36±0.60 <sup>a</sup>  | 28.04±1.71 <sup>c</sup>  |
| n-3         | 2.63±0.53 <sup>a</sup>   | 2.88±0.23 <sup>a</sup>   | 6.63±2.05 <sup>b</sup>   | 3.42±0.61 <sup>a</sup>   |
| n-6/n-3     | 8.07±1.18 <sup>b</sup>   | 7.91±0.36 <sup>b</sup>   | 3.21±2.35 <sup>a</sup>   | 8.47±1.19 <sup>b</sup>   |

\* Data are means ± standard error (n = 10). Different letters indicate significant differences ( $P<0.05$ ) between each group, and the same letters indicate that there is no significant difference ( $P>0.05$ ) between each group.
